# Supplementary material
Source: publisher figshare collection journal article supplement (https://tandf.figshare.com/articles/dataset/_/17159120)
Supplement: Supplementary file 2 [file 1]

### Supplemental File 3. Dutch quotes

| Number                                              | Original Dutch quote                                                                                                                                                                                                                                                                                                                                                       |
|-----------------------------------------------------|----------------------------------------------------------------------------------------------------------------------------------------------------------------------------------------------------------------------------------------------------------------------------------------------------------------------------------------------------------------------------|
| Quotes presented in the main text of the manuscript |                                                                                                                                                                                                                                                                                                                                                                            |
| 1                                                   | “Wat jij noemde, is met name op het gebied van artrose, maar ik denk dat als je een patiënt in beweging kan krijgen, is dat natuurlijk voor alle factoren gunstig.”                                                                                                                                                                                                        |
| 2                                                   | “Maar ik denk dat dat heel veel te maken heeft met, ja ook het idee, wat dan precies goed en wat niet goed is. Of je nou wel moet trainen of niet moet trainen of dat je voorzichtig moet doen of dat het pijn mag doen juist wel of niet. Ik denk dat dat, ja voor veel mensen dus lastig is, zeker voor patiënten ook, wat is het profijt van meer doen dan je al deed.” |
| 3                                                   | “Of het is een blok van twaalf behandelingen [fysiotherapie] en ja, daarmee heb je geen gedragsverandering. [...] Om dan die volgende stap te maken om zelf in beweging te blijven waar je eigenlijk natuurlijk helemaal niets voor hoeft te betalen, is wel een hele grote stap voor de mensen die niet sport-minded of bewegings-minded zijn.”                           |
| 4                                                   | “Niemand vindt het leuk om drie keer per dag oefeningen te doen. Uiteindelijk dan heb je die gedragsverandering niet, dat doe je voor een aantal weken en dan verwatert dat weer. Je moet er echt naar toe dat je iets kan toepassen, dus dat is net zoals met diëten, dat houdt niemand vol. Je moet een manier vinden wat bij iemand past en wat werkt voor diegene.”    |
| 5                                                   | “Maar dat [beweeginterventie] is dan de stok achter de deur in die regio maar in [regio] waar dus eigenlijk vrij weinig is, dan krijg je dus inderdaad die mensen dus niet...”                                                                                                                                                                                             |
| 6                                                   | “En wat ik eigenlijk aan het begin ook al noemde, is dat ik toch vaak in de regio wel mis dat er, dat het niet altijd eenduidig is of duidelijk is waar je inderdaad de juiste begeleiding daarin kan vinden.”                                                                                                                                                             |
| 7                                                   | “Ik heb er voor de aardigheid even de NHG-standaard er op nageslagen, wat staat er nou in voor ons, maar dat zijn ook maar nou drie regels geloof ik over matig-intensieve beweging wordt er dan genoemd. Maar ja, wat is dat precies en hoe ver mag je gaan?”                                                                                                             |
| 8                                                   | “Het is meer de kennis wat ontbreekt. [...] In dat van de artrose. [...] En wat de mogelijkheden zijn, en hoe je een patiënt kan helpen, wat je ze kan bieden, en ik denk dat dat wel, dat je dat nodig hebt.”                                                                                                                                                             |
| 9                                                   | “Wat wel is, wij zitten hier allemaal gemotiveerd, maar ik loop ontzettend aan tegen of artsen of zelfs chirurgen, waar ik het gesprek niet in kom, met ‘nee ik snijd wel, is sneller, hoef ik het gesprek ook niet aan te gaan, niet de discussie met de patiënt’.”                                                                                                       |
| 10                                                  | “Ik denk dat het alsnog wel heel belangrijk is dat, ook al heb je weinig tijd, dat het goed is om in ieder geval benoemd te hebben, als hulpverlener, het belang ervan, zonder direct al heel veel gedragsveranderingstechnieken toe te passen. Maar dat men                                                                                                               |

|    |                                                                                                                                                                                                                                                                                                                                                                                                                                                                                                                                                           |
|----|-----------------------------------------------------------------------------------------------------------------------------------------------------------------------------------------------------------------------------------------------------------------------------------------------------------------------------------------------------------------------------------------------------------------------------------------------------------------------------------------------------------------------------------------------------------|
|    | in ieder geval het een keer heeft gehoord.”                                                                                                                                                                                                                                                                                                                                                                                                                                                                                                               |
| 11 | “Ik geloof ook wel heel erg in zelf het goede voorbeeld geven. En ik heb nu sinds een tijdje een AIOS in de praktijk, dus één dag in de week doet hij dan de spoeddingen, en dan ga ik op de fiets bijvoorbeeld visites doen. En dan zet ik mijn fiets zo pontificaal voor de deur bij de patiënten neer, en dan zien ze mij gewoon komen fietsen en dan zeggen ze, ‘oh het is eigenlijk ook wel helemaal niet zo ver vanaf de praktijk hè’.”                                                                                                             |
| 12 | “Het zijn natuurlijk over het algemeen wel mensen die niet alleen artrose hebben maar ze hebben ook een hoge bloeddruk, ze hebben ook suikerziekte. En als je dan zegt van ‘ja als u dan inderdaad gewicht verliest en meer gaat bewegen, en eventueel ook een dieet gaat volgen’, ja dan pak je dus allerlei dingen pak je tegelijkertijd aan. En ja, dan is het dus aan de patiënt uiteindelijk, of die dat wil oppakken.”                                                                                                                              |
| 13 | “Sowieso negatieve ervaringen denk ik dat, dat wel heel bepalend is voor de patiënt of iets wel of niet gaat slagen. In de zin van he, ik krijg het natuurlijk ook regelmatig mensen over de vloer die dan eerder al eens bij een diëtist zijn geweest waar ze niets bereikt hadden, ja weet je, en dan, dan ben je eerst al bezig met van ‘oké, maar wat maakt dat het dan deze keer wel eventueel zou kunnen gaan lukken’.”                                                                                                                             |
| 14 | “En waar ik met name tegen aan loop [...] dat de motivatie van mensen toch is dat ze liever een ‘quick fix’ willen hebben dan dat ze dus eindeloos in een traject terecht komen met beweging en met afvallen. En daarbij komt ook nog dat ze natuurlijk dan de buurman of de buurvrouw spreken die dan een operatie heeft gehad voor heup of knie, en die loopt dus nu weer als een kievit. En dan willen ze toch heel graag willen ze dus toch naar de orthopeed, om te horen te krijgen dat ze ook in aanmerking komen voor een knie- of heupprothese.” |
| 15 | “Als de buurvrouw een goede operatie heeft gehad, ja geef mij ook maar zo’n operatie. Maar als de buurvrouw hele goede ervaring met diëtisten heeft gehad, dan wil ik daar ook wel heen.”                                                                                                                                                                                                                                                                                                                                                                 |
| 16 | “Je loopt er ook tegenaan dat patiënten heel vaak zeggen van ‘ik kan niet afvallen’ of ‘ik weet niet hoe dat moet’.”                                                                                                                                                                                                                                                                                                                                                                                                                                      |
| 17 | “Het is met roken ook zo als de partner rookt en de ander moet stoppen met roken, dan werkt het ook niet. Maar dat is met eten en bewegen en dergelijke is dat natuurlijk ook zo.”                                                                                                                                                                                                                                                                                                                                                                        |
| 18 | “Ja ik heb het letterlijk wel gehoord, dat fysio is een tijd niet vergoed geweest, niet goed vergoed geweest met artrose, diëtisten ook niet, die zeggen ‘geef mij maar een nieuwe knie, dat is veel goedkoper voor mij’.”                                                                                                                                                                                                                                                                                                                                |
| 19 | “Ik loop er wel eens tegenaan dat mensen zeggen, ‘ja ik woon of ik kom niet richting de diëtist bij mij of ik ben bij een fysio geweest en die doet alleen maar dit’. En als je dat vaker hoort dan denk je nou oké mensen uit die regio, dat heeft niet zoveel zin want die hebben geen toegang tot ondersteunende diensten, dus ja dat belemmert mij dan wel om aan lifestyle interventions te doen.”                                                                                                                                                   |
| 20 | “Je hebt een bovenlaag van mensen, die nou ja, een beetje dat matteüseffect, dat als je                                                                                                                                                                                                                                                                                                                                                                                                                                                                   |

|    |                                                                                                                                                                                                                                                                                                                                                                                                           |
|----|-----------------------------------------------------------------------------------------------------------------------------------------------------------------------------------------------------------------------------------------------------------------------------------------------------------------------------------------------------------------------------------------------------------|
|    | alles al hebt dan krijg je nog meer, van hoogopgeleid, gezond, goed geïnformeerd, kan lezen en kan op internet shiften wat onzin is en wat niet. En juist de mensen die het allemaal niet kunnen en niet hebben, die vallen dan weer buiten de boot.”                                                                                                                                                     |
| 21 | “Heel veel mensen leggen het ook bij jou neer he, van ‘zorg maar voor mij, en geef mij maar een nieuwe knie en dan is het klaar. En dan ga ik wel bewegen’, maar zo is het niet.”                                                                                                                                                                                                                         |
| 22 | “Je sociale kaart is belangrijk, de transparantie, hoe ken je elkaar, wat weet je van elkaar, wat zie je van elkaar.”                                                                                                                                                                                                                                                                                     |
| 23 | “Zeker nu als HAIO speelt dat wel heel erg mee, het nog niet goed kennen van de regio, dus niet weten wat er is, en waar je iedereen kan vinden.”                                                                                                                                                                                                                                                         |
| 24 | “Samenwerking volgens mij, daar gaat het volgens mij aldoor over, we moeten gewoon dezelfde dingen zeggen. Dus moeten we op de een of andere manier tot een soort iets komen waarin we staan achter dezelfde adviezen. En dan kan je inderdaad iemand naar iemand anders sturen die langdurigere gesprekken heeft over voeding of afvallen. Maar dan moeten we dat in ieder geval met zijn allen vinden.” |
| 25 | “Maar ook de ene kliniek of de ene ziekenhuis heeft andere criteria dan de andere, van [ziekenhuis] in [plaatsnaam] hoef je zoveel te wegen, en in [ziekenhuis] is dat geen probleem. Ja, zo, is het ook heel moeilijk om iets tegen een patiënt, om voorlichting aan een patiënt te geven.”                                                                                                              |
| 26 | “Gesprekken transmuraal, multidisciplinair tussen de verschillende zorgverleners, dat je op één lijn komt te zitten met ook één heldere boodschap richting de patiënt. Dat je gewoon weet van ‘goh, als ik dit pad in sla, dan weet ik dat het in de tweede lijn op dezelfde manier verder gaat’, dat lijkt me heel nuttig.”                                                                              |
| 27 | “Nu heb ik ook vaak mensen, die zeggen van ‘nou mijn huisarts zei, jij moet gewoon een nieuwe knie’, punt. En nou ja, en dan komt ik met, weet je, kom ik met mijn praatje en dan sta ik eigenlijk al 1-0 achter, en dan, ja, oké, nou.”                                                                                                                                                                  |
| 28 | “[naam diëtist] zit hier natuurlijk, dus daar hebben we dus ook korte lijnen mee. En bij ons in de praktijk is er ook nog één keer in de week een psycholoog aanwezig, daar hebben we ook hele korte lijnen mee, dus dan kan je heel snel verwijzen en overleggen, ja dat ervaar ik wel als positief.”                                                                                                    |
| 29 | “Ik vind de orthopeden wel ongeveer de mensen waar je het minste mee communiceert. En dat wordt dan ook van onze kant, wel een beetje van, hup over de schutting, ‘zoek het uit’. Je hoort er toch nooit wat van terug.”                                                                                                                                                                                  |
| 30 | “Jullie [huisartsen] hebben denk ik ook tien minuten consulten, net als wij. Die patiënt die komt dus één of misschien twee of drie keer tien minuten bij ons. Bij de fysio zitten ze misschien wel twee keer in de week, en een half uur.”                                                                                                                                                               |
| 31 | “Wij liepen altijd, altijd de praktijkondersteuner, meestal twee assistentes en een dokter [wandegroep]. Dus dat werd ook wel geweldig gewaardeerd door de mensen, dat we daar zelf onze vrije avonden aan gaven. Ja en dat is natuurlijk niet iets wat je eindeloos volhoudt.”                                                                                                                           |

|    |                                                                                                                                                                                                                                                                                                                                                                                                        |
|----|--------------------------------------------------------------------------------------------------------------------------------------------------------------------------------------------------------------------------------------------------------------------------------------------------------------------------------------------------------------------------------------------------------|
| 32 | “Het project [beweeginterventie] kost € 30.000 per jaar. Daar lopen wij natuurlijk altijd tegen aan.”                                                                                                                                                                                                                                                                                                  |
| 33 | “In het gezondheidscentrum [...] we hebben een diëtiste, en we hebben inderdaad een psycholoog [...] en de praktijkondersteuners. Dus we zoeken elkaar ook op.”                                                                                                                                                                                                                                        |
| 34 | “Misschien moet er ook zoiets [registratiesysteem] komen voor mensen met artrose. Niet gemakkelijk, maar misschien dat zo iets, kan helpen, om een slag te slaan.”                                                                                                                                                                                                                                     |
| 35 | “Maar op het moment dat we met zijn allen afspreken, nou dat moet, hét communicatiemiddel worden, dat maakt het ook wel makkelijker dat je als zorgprofessionals onderling gewoon ja elkaar beter op de hoogte kan houden van het verloop. [...] Dus een online communicatie middel om, ja, rapportages makkelijker te sturen, of onderling te kunnen communiceren. Even makkelijk een vraag stellen.” |
| 36 | “Op het moment dat er iemand is, bij wijze van spreken he van uit zo’n onderzoeksproject, en die wordt daarin vrijgesteld om dat soort dingen op te gaan zetten. En die kan dat, dat wordt zijn werk ook. Dan ga je meters maken.”                                                                                                                                                                     |
| 37 | “Dat je dus één contactpersoon hebt, die je of kan bellen, of kan mailen, of wat dan ook. En dan zegt van ‘ik heb deze patiënt, kan ik die bij jou langs laten komen’. En dat die persoon vervolgens de, zeg maar, de coördinerende persoon is om te zeggen van ‘nou, je gaat dat traject in, of je gaat dit traject in’.”                                                                             |
| 38 | “De voorzitter Raad van Bestuur die wil daar ook wel in mee gaan nu. Die ziet dat ook, het belang.”                                                                                                                                                                                                                                                                                                    |
| 39 | “We zijn met zijn allen steeds meer stil gaan zitten, zitten in de auto, hele woonwijken daar beweegt niemand meer van, dus als je bij de omgeving kijkt komt ook niemand uit zijn stoel. Dus het is een hele kunst, dit je moet bijna dat heel groot aanpakken, om zeg maar, ja bewegen te promoten.”                                                                                                 |
| 40 | “Ik denk dat het bewegingsonderwijs hierin heel erg belangrijk is. Dus, de politiek, maar de verzekeraars, zijn ook bezig met vakdocenten weer, het liefst drie keer in de week, ook op lagere scholen in te zetten. Dus ja er gebeurt wel een hele hoop, maar het is een beetje ja, wat gerommel in de marges soms denk ik wel eens.”                                                                 |
| 41 | “En daar moet de zorgverzekeraar natuurlijk ook in mee gaan. Het moet ook niet zo zijn dat het is van ‘nou hier heb je tien sessies, die mag je daar doen’. En daarna dan houdt het op.”                                                                                                                                                                                                               |
| 42 | “Je kunt in de eerste lijn heel veel van die dingen oplossen. Dan zou ik zeggen dan kan je een mooi shared savings project bedenken dat het aantal onnodige verwijzingen naar de orthopedie, dat moet je fors kunnen omlaag brengen. Want iemand die voor niets bij jullie zit, dat is zonde van het geld. Maar dat zijn de schotten in de zorg die dat tegenhouden.”                                  |
| 43 | “Er is heel veel over voeding te vinden, op internet en in de boeken, en in diëten die misschien niet eens wetenschappelijk bewezen zijn. Dus je kunt het overal vandaan plukken.”                                                                                                                                                                                                                     |
| 44 | “Het is veilig [begeleiding door praktijkondersteuner] want mensen die kennen dat, en                                                                                                                                                                                                                                                                                                                  |

|                                         |                                                                                                                                                                                                                                                                                                                                                                                                               |
|-----------------------------------------|---------------------------------------------------------------------------------------------------------------------------------------------------------------------------------------------------------------------------------------------------------------------------------------------------------------------------------------------------------------------------------------------------------------|
|                                         | die komen er toch al voor hun bloeddruk, en die, dat, dat, die heeft dan wel een makkelijke ingang, die noemen elkaar bij de voornaam. Dat is heel laagdrempelig.”                                                                                                                                                                                                                                            |
| 45                                      | “Het is ook een beetje perceptie van de patiënt, he. Die zien veel dingen als een recht tegenwoordig. Ik heb het recht om naar een specialist verwezen te worden, want ik betaal zoveel premie per maand. [...] En jij moet mij gewoon verwijzen.”                                                                                                                                                            |
| 46                                      | “Misschien moeten wij veel meer, ja, harder daarin zijn. Ook in de adviezen geven en niet te soft optreden.”                                                                                                                                                                                                                                                                                                  |
| 47                                      | “Maar toen je net begon over je onderzoek, zat ik te bedenken, goh waarom doen we dat [toepassen van leefstijlinterventies] minder, wat ik, wat ik herken is van je doet het bij diabetes, COPD [chronic obstructive pulmonary disease] en wat meer systeem gebeurens en wat meer algemeen en misschien zit er in ons denken nog wat meer lokaal. [...] Een knie, of een heup, ja.”                           |
| 48                                      | “Eén belangrijk ding vind ik denk ik dat als boodschap door iedereen gedragen moet worden is dat het niet een aandoening is waar je niets aan kan doen. [...] En dus ook daarmee dat het woord ‘slijtage’ eigenlijk niet meer gebruikt mag worden door zorgprofessionals, omdat dat gewoon een fout beeld geeft van de oorzaak en van de mogelijkheden.”                                                      |
| 49                                      | “Dat is misschien ook wel een beetje het nadeel van deze operatie, dat mensen zo snel weer op de been zijn zeg maar, dat ze zich zo goed voelen.”                                                                                                                                                                                                                                                             |
| 50                                      | “Ik denk wel dat je heel erg moet uitkijken om niet heel snel in de eigen schuld dikke bult verhaal te vervallen. Want leefstijl draagt denk ik inderdaad erg vaak bij aan het ontstaan van aandoeningen, maar om het nou de oorzaak te noemen, gaat wel wat ver. [...] Als je het hebt over artrose, dan zal leefstijl zeker bijdragen, maar gewoon puur leeftijd en erfelijke factoren spelen ook een rol.” |
| 51                                      | [wanneer je zou weigeren om een operatie uit te voeren] “Je rekent mensen af voor iets wat ze misschien wel helemaal niks aan kunnen doen. Dus je praat ze ook nog een enorm schuldgevoel aan.”                                                                                                                                                                                                               |
| 52                                      | “Maar met artrose is dat ook wel lastig, he, want het is, we maken een foto, maar we weten ook dat een foto niet altijd correspondeert met de pijn. Pijn is heel subjectief, de één die heeft pijn en die ervaart heel veel beperkingen, de ander voelt pijn en gaat gewoon door.”                                                                                                                            |
| Quotes presented in Supplemental File 2 |                                                                                                                                                                                                                                                                                                                                                                                                               |
| 53                                      | “Dus ook misschien los van het afvallen, bewegen met als doel afvallen, heeft bewegen ook andere positieve effecten natuurlijk.”                                                                                                                                                                                                                                                                              |
| 54                                      | “Maar ik ben ook wel heel erg benieuwd naar wat nou eigenlijk, inderdaad ook wat het effect ervan nou gaat hebben, van dat daar [gewichtsverlies] maar steeds weer over beginnen en wat voor effect dat dan uiteindelijk heeft op de uitkomsten van iemand na een operatie, of dat een operatie langer uitgesteld kan worden. Wat dat nou precies doet.”                                                      |
| 55                                      | “Dat [gedragsverandering] doe je niet even in vijf minuutjes, één-op-één, dat heeft, ik,                                                                                                                                                                                                                                                                                                                      |

|    |                                                                                                                                                                                                                                                                                                                                                                                                                                                                                                                                                                                                                                        |
|----|----------------------------------------------------------------------------------------------------------------------------------------------------------------------------------------------------------------------------------------------------------------------------------------------------------------------------------------------------------------------------------------------------------------------------------------------------------------------------------------------------------------------------------------------------------------------------------------------------------------------------------------|
|    | ik zie dan mensen inderdaad gewoon één-op-één soms twee jaar lang één keer per week of twee keer per week ook wel in het begin, of drie keer. Het is echt, het heeft veel meer tijd nodig en energie dan dat er nu gebeurt zeg maar.”                                                                                                                                                                                                                                                                                                                                                                                                  |
| 56 | “Je hebt natuurlijk afvallen en afvallen. Je hebt genoeg mensen die dus van iets van die idiote crash diëten volgen, ja dat werkt gewoon niet. Dat is gewoon bekend, die vallen af als een, binnen een paar maanden vallen ze tien kilogram af, en na een maand tijd is het er gewoon weer bij. Dat werkt gewoon niet.”                                                                                                                                                                                                                                                                                                                |
| 57 | “Ik denk dat dat uiteindelijk met het, als je echt obees bent ook zo is, dan is het eigenlijk misschien toch meer een soort verslaving, ten minste dezelfde kenmerken dat je daar dus gewoon altijd last van gaat blijven houden. En altijd gevoelig voor bent. Misschien moet je daar dan ook meer op in spelen, behalve vertellen wat je moet doen, net als ‘je moet stoppen met roken’, dat weet iedereen al.”                                                                                                                                                                                                                      |
| 58 | “Ik voel heel vaak, dan komen mensen terug en dan denk ik ja, nou nu zijn ze bij de fysiotherapeut en bij de diëtist en het lukt niet want, ja, nee, ik heb het idee dat het gewoon het grote aspect dan vergeten wordt. Dus inderdaad de [gedrags]verandering, ze zien de noodzaak niet, en de motivatie is er niet, dus, en daar zou ik meer behoefte aan hebben inderdaad, aan iemand die dan wat breder kijkt, en toch probeert ze intrinsiek gemotiveerd te krijgen. Waardoor ze het toch leuk vinden om dan toch een stukje te gaan fietsen, of weet ik veel. In plaats van 5 minuten, 10 minuten te gaan lopen of wat dan ook.” |
| 59 | “Je zult eerst moeten aansluiten waar bij de patiënt zich bevindt. [...] En daar vind ik dat wij als huisartsen, naarmate je al langer in een praktijk zit, ken je de mensen beter en vind je ook steeds meer aanknopingspunten he, waar je het over kan hebben om iemand te motiveren.”                                                                                                                                                                                                                                                                                                                                               |
| 60 | “Want bewegen kun je wel zeggen, dat moet iedereen doen, maar je gaat alleen maar bewegen als je iets kiest wat je leuk vindt. En dat zal ook per patiënt verschillen, en daar moet je tijd in investeren.”                                                                                                                                                                                                                                                                                                                                                                                                                            |
| 61 | “Maar ik denk dat je, uiteindelijk gaan die mensen pas actie ondernemen als ze ergens heen gaan, met een persoon praten en drie maanden later weer met diezelfde persoon praten. En dan zien van ‘oké, we hadden dit afgesproken, dit is niet gelukt’. Of denken ze ‘oh ik moet daar binnenkort heen, ik moet wel wat te vertellen hebben’ ofzo. En als ze filmpjes gaan kijken, hoeveel filmpjes dat ook zijn, dan gaan ze dat toch niet doen. Dus ik denk uiteindelijk dat ze naar een persoon moeten, of een loket, of een begeleider, wie dat ook is.”                                                                             |
| 62 | “Dat zie je in het vak, maar ook in de opleiding, dat er, nou ja wat ik net ook al zei, weer allemaal losse appjes en programma’s en ideeën komen die los van elkaar allemaal prachtig zijn, maar nooit echt van de grond komen.”                                                                                                                                                                                                                                                                                                                                                                                                      |
| 63 | “Ik heb natuurlijk nu ook heel vaak, verwijscriteria. En dan staat er bijvoorbeeld bij de knie, staat maak eerst een foto, en dan zegt mijn standaard, maak niet een foto. En dan van ja, wat ga ik nou doen.”                                                                                                                                                                                                                                                                                                                                                                                                                         |

|    |                                                                                                                                                                                                                                                                                                                                                                                         |
|----|-----------------------------------------------------------------------------------------------------------------------------------------------------------------------------------------------------------------------------------------------------------------------------------------------------------------------------------------------------------------------------------------|
| 64 | “Ik denk dat we over het algemeen te weinig ervan afweten [voeding], wat goed is en wat niet goed is.”                                                                                                                                                                                                                                                                                  |
| 65 | [als advies] “Ik zou een stukje scholing nog willen benadrukken inderdaad, bij professionals. He, dat, wat is inderdaad een gezonde leefstijl, hoe sta je daar zelf in. En daarnaast, het stukje gesprekstechniek, ik denk dat dat ook belangrijk is om mee te nemen in, in een advies of een interventie, dat het niet even is van ‘ja je moet er wat aan doen en tot volgende week’.” |
| 66 | “Ik denk dat wij weinig scholing krijgen over het bewegingsapparaat in het algemeen, als huisartsen, ja. Ten minste, dat voel ik heel erg bij mezelf.”                                                                                                                                                                                                                                  |
| 67 | [met betrekking tot scholing] “Ik denk onder andere over de verschillende mogelijkheden die er zijn, maar ook bepaalde fysiologie, en misschien ook wel een stukje motiverende gespreksvoering.”                                                                                                                                                                                        |
| 68 | “Dus ik vind het wel een heel belangrijk onderwerp om over na te denken hoe we tools kunnen krijgen ook om mensen toch aan het bewegen te krijgen en houden.”                                                                                                                                                                                                                           |
| 69 | “Nog moet je wel als professional daarvoor open staan inderdaad he, en dat mis ik gewoon heel vaak. Vaak is het gewoon, ‘nou hier heb je medicijnen en tschüss’. En dan wordt het [leefstijl] niet eens, het wordt niet eens besproken.”                                                                                                                                                |
| 70 | “Wij zitten hier als gemotiveerde groep, maar er is natuurlijk nog een hele grote groep, die er misschien minder van afweet, of minder gemotiveerd is.”                                                                                                                                                                                                                                 |
| 71 | “Je moet het neerleggen bij degene die dat het beste kan. Ik denk dat we allemaal hetzelfde moeten zeggen, dat gewichtsreductie wenselijk is, maar ik denk niet dat ik de aangewezen persoon ben om dat aan een patiënt helemaal op een netst mogelijke manier uit te leggen. Bovendien, ik ben daar niet van.”                                                                         |
| 72 | “En dat het ook duidelijk gemaakt moet worden dat voeding niet iets is voor alleen diëtisten, maar echt voor elke arts.”                                                                                                                                                                                                                                                                |
| 73 | “Laatst bij een klinische les aanwezig geweest op een afdeling, iedereen komt binnen met gevulde koeken in de mond en terwijl ja, patiënten liggen daar allemaal, dus het is ook een stukje voorbeeld, ook al daar.”                                                                                                                                                                    |
| 74 | “En bij mensen die veel klachten hebben maar echt maar een klein beetje artrose, dan doe ik wel wat beter mijn best. Want die ga, die zet ik dan ook niet op de lijst om te opereren, dus dan vind ik dat het zin heeft, meer zin heeft om dat traject wel in te gaan.”                                                                                                                 |
| 75 | “En als ze er al zijn geweest [fysiotherapeut], dan hebben ze er toch wel vaak slechte ervaringen mee. En dan geven ze dat aan mij terug, van ‘ja daar ben ik al geweest en dat heeft niets geholpen’. Dus ja, kun je daar eigenlijk ook niet over in gesprek gaan verder.”                                                                                                             |
| 76 | “Mensen slikken liever een pilletje extra dan dat ze er moeite voor moeten doen. Want het kost moeite. Dat ik, ik denk dat dat het grootste probleem is hoor, ze hebben, ze willen het gewoon zo makkelijk mogelijk hebben.”                                                                                                                                                            |
| 77 | “Heel veel mensen willen eigenlijk [...] ergens heen, oplossing, en weer terug en                                                                                                                                                                                                                                                                                                       |

|    |                                                                                                                                                                                                                                                                                                                                                                                                                                                          |
|----|----------------------------------------------------------------------------------------------------------------------------------------------------------------------------------------------------------------------------------------------------------------------------------------------------------------------------------------------------------------------------------------------------------------------------------------------------------|
|    | verder met het leven zeg maar. Dus ze hebben eigenlijk niet heel veel zin om eerst 60 kg af te vallen.”                                                                                                                                                                                                                                                                                                                                                  |
| 78 | “Soms ook gewoon als iemand bij bijvoorbeeld de reumatoloog is geweest, of bij een orthopeed is geweest. En dan wordt gezegd, ‘nou ga maar naar de fysiotherapeut’, en dan, die weet eigenlijk ook zelf niet zo goed wat de fysiotherapeut doet, dus die geeft dan al een verkeerd beeld aan de patiënt.”                                                                                                                                                |
| 79 | “Dat is een beetje het beeld wat mensen nog steeds hebben, van nou ja die mevrouw, of die meneer, dat kan natuurlijk ook, die gaat gewoon zeggen dat ik zeven boterhammen moet eten en niet meer mag snoepen. Ja, dus dat, dat is nog steeds wel het beeld wat heel veel mensen daarvan hebben als ze ooit één keer, tien jaar geleden of twintig jaar geleden, bij een diëtist zijn geweest. En dat is best wel moeilijk om dat patroon te doorbreken.” |
| 80 | “De patiënt gelooft heel erg, ook gevoed door omgeving, en weet ik veel, literatuur die ze lezen, dat de orthopeed de beste afslag is.”                                                                                                                                                                                                                                                                                                                  |
| 81 | “Maar ik heb het gevoel dat het merendeel van de mensen die te zwaar is [...] niet letterlijk onder ogen ziet dat dat gewoon een probleem is en dat moet opgelost worden.”                                                                                                                                                                                                                                                                               |
| 82 | “Ik denk dat mensen zich wel realiseren dat het gezonder is om een gezonde leefstijl aan te nemen, dat een gezonde voeding bijdraagt en dat bewegen bijdraagt maar dat ze in de wirwar van alle informatie, het moeilijk vinden om daar richting aan te geven.”                                                                                                                                                                                          |
| 83 | “Ik denk dat het ook heel belangrijk is, gewoon, dat de patiënt gewoon goed uitgelegd krijgt wat eigenlijk artrose is. Gewoon waarom bewegen goed is, wat dat met het kraakbeen doet.”                                                                                                                                                                                                                                                                   |
| 84 | “Ik heb best veel moeite om mijn patiënten überhaupt informatie uit te leggen in taal die zij begrijpen. Dat levert een probleem op, ik merk ook, we hebben hele goede website informatie voor de huisartsen, [naam website], maar zelfs dat is nog voor veel mensen te moeilijk. En ook, veel ongeletterdheid, en laaggeletterdheid, dus dat maakt het wel lastig om een goed geïnformeerd gesprek te voeren met patiënten.”                            |
| 85 | “En zeker als mensen wat ouder worden, he, en ze wonen allemaal alleen, hoe ga je dat oppakken, en wat kun je er nog aan doen, is er nog wat aan te doen.”                                                                                                                                                                                                                                                                                               |
| 86 | “Ik werk veel met de sociale omgeving, ik kan wel heel hard aan iemand lopen trekken maar als er vijf mensen thuis zijn die toch allemaal het weer anders doen, dan is dat toch wel echt heel zwaar, om iemand te kunnen veranderen.”                                                                                                                                                                                                                    |
| 87 | “Ze kunnen niet een abonnement op het zwembad betalen of de sportschool of wat dan ook. Nou wat kun je doen, dan kun je rondlopen in je buurt. Nou daar heb je ook op een gegeven moment wel genoeg van. Een leefstijlcoach twee jaar, ik weet niet of je vergoed wordt maar ik denk het niet.”                                                                                                                                                          |
| 88 | “En het is natuurlijk ook zo, dat een aantal mensen die gaan dan naar de fysiotherapeut. En die kunnen dan tien sessies krijgen, en dan is het voor de verzekering afgelopen. En dan moeten ze daarna, moeten ze de sessies zelf gaan                                                                                                                                                                                                                    |

|     |                                                                                                                                                                                                                                                                                                                                                                                                                                                                                                                                                                                                                                                      |
|-----|------------------------------------------------------------------------------------------------------------------------------------------------------------------------------------------------------------------------------------------------------------------------------------------------------------------------------------------------------------------------------------------------------------------------------------------------------------------------------------------------------------------------------------------------------------------------------------------------------------------------------------------------------|
|     | betalen. En dan zeggen ze van ‘ja maar dat kan ik niet betalen, dus stuur me dan toch maar naar de orthopeed door’.”                                                                                                                                                                                                                                                                                                                                                                                                                                                                                                                                 |
| 89  | “Maar een gemiddelde [smartphonemark] heeft wel de [naam smartphone] app waar je al een stappenteller hebt en die telefoon, ja die hebben ze toch altijd op zak. Dus dat kan weer motiveren in het stappen zetten, de stappentellers zijn dan wel positieve verhalen over.”                                                                                                                                                                                                                                                                                                                                                                          |
| 90  | “Ik merk toch ook in [plaatsnaam], dat er best wel veel jong, jonge mensen zijn die bijvoorbeeld ook gewoon geen internet in hun abonnement hebben of thuis niet eens internet hebben. Dus die komen daar ook niet aan toe. En mensen die laaggeletterd zijn die hebben ook geen apps op hun telefoon.”                                                                                                                                                                                                                                                                                                                                              |
| 91  | “De patiënt die doet zeg maar, ‘hier is mijn probleem, alstublieft’. En dan gaat hij zitten.”                                                                                                                                                                                                                                                                                                                                                                                                                                                                                                                                                        |
| 92  | “Wat we willen is, het is normaal om te sporten en elke dag een rondje te wandelen. En je wilt niet per se dat je daar een professional voor nodig hebt.”                                                                                                                                                                                                                                                                                                                                                                                                                                                                                            |
| 93  | “Netwerk kennen is belangrijk.”                                                                                                                                                                                                                                                                                                                                                                                                                                                                                                                                                                                                                      |
| 94  | “Je merkt ook wel, binnen bijvoorbeeld verschillende fysiotherapeuten ook weer heel veel verschil. Dat merken jullie vast ook wel. Dat je op een gegeven moment weet je wel welke fysiotherapeuten zijn meer van het patiënten in beweging krijgen, dus daar wil je graag naar verwijzen, tenminste ik wel. En welke zijn meer van het, nou ja, kneden en dat soort toepassingen.”                                                                                                                                                                                                                                                                   |
| 95  | “Dus waar ik ook wel aan zit te denken zoals een soort leefstijl poli. [...] Dat ze, nou eigenlijk bij wijze van spreken een uur hier zijn, en dan een kwartier bij die, en een kwartier bij die, en dan een kwartier bij die, dus dat je echt van de ene zorgverlener naar de andere gaat die ook weer dingen met elkaar afstemmen. Goed, dat is misschien niet zo direct in eenieders mogelijkheid maar zoiets, he, ik denk wel krachten bundelen, is denk ik wel belangrijk hierin. Wat net ook al werd gezegd van, ‘die zegt dat, die zegt weer heel wat anders’. Dan sta je ook als hulpverlener allemaal, he, met de neuzen dezelfde kant op.” |
| 96  | “Het wordt een stuk makkelijker als we allemaal dezelfde taal spreken en dat doen we hier aan tafel nog niet eens.”                                                                                                                                                                                                                                                                                                                                                                                                                                                                                                                                  |
| 97  | “Het is heel belangrijk dat we het multidisciplinair aanpakken.”                                                                                                                                                                                                                                                                                                                                                                                                                                                                                                                                                                                     |
| 98  | “Maar het gaat erom dat je met elkaar dezelfde boodschap, dat verwijzers, en dat is een huisarts, maar dat zijn ook dat alle fysiotherapeuten weten, en alle diëtisten weten hoe je daar met elkaar instaat.”                                                                                                                                                                                                                                                                                                                                                                                                                                        |
| 99  | “Dat ik patiënten verwijs naar die mensen die hetzelfde idee hebben, die weten, en ja, die als ik zeg een beweegprogramma dat ze niet lokaal de knie behandelen maar het hele lichaam.”                                                                                                                                                                                                                                                                                                                                                                                                                                                              |
| 100 | “Het zijn in ieder geval fysio’s waar wij naar verwijzen, waarvan wij weten wat ze een beetje doen qua oefenprogramma’s, en dat ze niet alleen maar gaan masseren.”                                                                                                                                                                                                                                                                                                                                                                                                                                                                                  |
| 101 | “Maar het verschilt ook wanneer je, wanneer je een totale knie doet, bij wat voor BMI                                                                                                                                                                                                                                                                                                                                                                                                                                                                                                                                                                |

|     |                                                                                                                                                                                                                                                                                                                                                             |
|-----|-------------------------------------------------------------------------------------------------------------------------------------------------------------------------------------------------------------------------------------------------------------------------------------------------------------------------------------------------------------|
|     | [body mass index]. De één zegt dat doe ik absoluut niet, de ander zegt nou ja, weet je, doe ik wel.”                                                                                                                                                                                                                                                        |
| 102 | [als advies] “Ik denk aansluitend het verbinden van de eerste en de tweede lijn, zeg maar. Dus dat we met elkaar samenwerken tot één beleid.”                                                                                                                                                                                                               |
| 103 | “Ik denk dat de paramedici zich best wel elkaar al opzoeken in dit verhaal. Maar dat de, de stap zeg maar, naar de ziekenhuizen toe, ik denk dat daar gewoon nog een stuk van verbetering in zit. De fysiotherapie, de diëtetiek, de leefstijl- en beweging, dat zijn dingen die elkaar wel weten te vinden.”                                               |
| 104 | “Als je met zijn allen gewoon hetzelfde stappenplan hebt, dan kom je al, dan ben je in ieder geval gezamenlijk bezig om met gezamenlijk beleid...”                                                                                                                                                                                                          |
| 105 | “Dat is ook juist de bedoeling met zo’n netwerk. Dat je gebruik maakt van ieders kracht, kennis, ervaring en kunde.”                                                                                                                                                                                                                                        |
| 106 | “En als dan vervolgens iedereen maar absoluut hetzelfde verhaal vertelt. Dan wordt het ook nog weer steeds weer [...] opnieuw gebracht en herhaald.”                                                                                                                                                                                                        |
| 107 | “Maar dan moet iedereen ook wel hetzelfde zeggen. Want als ik zeg van ‘ja je moet afvallen’ en ze gaan vervolgens naar een ander en die zegt van ‘ja, en nee kom maar hier hoor mevrouwtje, ik plaats die knie [prothese] er wel in’.”                                                                                                                      |
| 108 | “Ik denk dat je dat als netwerk ook moet gaan afstemmen samen van he, hoe ga je een patiënt informeren. Wat zeg je wel, wat zeg je niet, laat ik het zo zeggen. Dat je wel met zijn allen op dezelfde lijn zit.”                                                                                                                                            |
| 109 | “Als eerstelijner krijg je niet vaak een terugkoppeling vanuit het ziekenhuis, eigenlijk niet. Maar dat gebeurt zelfs niet binnen mijn eigen discipline.”                                                                                                                                                                                                   |
| 110 | [als advies] “Inderdaad kleinschalig netwerk met wie je toch inderdaad regelmatig echt fysiek ook contact hebt om dingen en patiënten te kunnen bespreken. En ik denk dat dat ook heel waardevol is. Dus wat, hoe wij dat nu ook wel voor de ouderen doen zou dat ook heel mooi zijn voor artrose patiënten.”                                               |
| 111 | “Dat je gewoon de tijd hebt of kan nemen om die mensen uit te leggen wat je ermee bedoelt, dat je ze niet wilt beledigen door te zeggen dat ze te dik zijn of weg wilt pesten of omdat je geen zin hebt in de complicaties of wat dan ook. Maar om ze bewust te laten worden van het probleem. [...] En dat red je inderdaad niet in vijf of tien minuten.” |
| 112 | “Tijdgebrek dat speelt bij ons ook wel een grote rol, in onze praktijk heb je tien minuten heb je voor een patiënt, of je moet een dubbel consult hebben maar normaal is het tien minuten. En dan moet er veel gebeuren in die tien minuten.”                                                                                                               |
| 113 | “Daar hebben we eigenlijk wel behoefte aan, dat je al die sociale netwerken rondom je heen, maar dat kost heel veel tijd, ja. [...] Ja, om in kaart te brengen ja, om die contacten goed te houden, weten wie je wanneer moet hebben.”                                                                                                                      |
| 114 | “Zo is het in de fysiotherapie, wij mogen diabeten en mensen met overgewicht niet meer individueel behandelen, die moeten in groepen. [...] Dus die mag je niet meer één op één, ja mag wel, maar daar krijg je gewoon veel minder geld voor. [...] En dat                                                                                                  |

|     |                                                                                                                                                                                                                                                                                                                                                                                                                                                                                                                          |
|-----|--------------------------------------------------------------------------------------------------------------------------------------------------------------------------------------------------------------------------------------------------------------------------------------------------------------------------------------------------------------------------------------------------------------------------------------------------------------------------------------------------------------------------|
|     | kan dus wel weer belemmeren voor sommigen daarin.”                                                                                                                                                                                                                                                                                                                                                                                                                                                                       |
| 115 | “Maar dat heeft toch ook weer met financiering te maken, wat je in de huisartsenpraktijk, of wat je in de eerste lijn zag op een gegeven moment, werd dat gepromoot, net zoals [...] de geïntegreerde eerste lijn, daar was een subsidie voor, dat managers aangesteld konden worden he, die gingen mensen verbinden, die hadden dat, dat was hun werk.”                                                                                                                                                                 |
| 116 | “Ik zit bij twee fysiotherapiepraktijken, zit ik, houd ik praktijk. En met hun werk ik veel samen qua, zij zien mensen ook in het voortraject dan wel in het na traject voor de operatie, dus met betrekking tot de nieuwe heup. En daarbij zie ik, zij verwijzen direct naar mij door voor voeding. Om dat te ondersteunen, met betrekking tot gewichtsverlies.”                                                                                                                                                        |
| 117 | “Wij hebben natuurlijk van de andere chronische ziekten, hebben wij dus een ketenzorg programma, waarbij dus gewoon alle patiënten in beeld hebt, maar de artrose groep, ik ken ze niet. Af en toe kom je, zie je eens iemand voorbij komen, en dan is het dan vaak omdat ze bellen of komen met een klacht. Maar de groep heb ik niet in beeld, en ik denk de huisartsen zelf ook niet.”                                                                                                                                |
| 118 | “De praktijk is nu natuurlijk dat je een paar enthousiastelingen nodig hebt die ervoor gaan, zeg maar, en dat is dus heel gefragmenteerd per regio of die mensen zijn opgestaan, zoals bij jullie, of niet.”                                                                                                                                                                                                                                                                                                             |
| 119 | “Dat de dingen zijn al opgetuigd, de dingen zijn al geregeld, de logistiek staat al. Er zitten personen die je kunt regelen, en de vergoeding natuurlijk wordt dan ook daarin meegekomen. Als dat al is geregeld, dan wordt het makkelijker ook voor de andere zorgverleners om mee te doen.”                                                                                                                                                                                                                            |
| 120 | “Wat wij met zijn allen doen in deze maatschappij, he, dat is heel ingewikkeld om dat te veranderen. Wij hebben deze focusgroep discussie, wij zitten nu allemaal op een stoel. We weten hoe slecht dat is. Maar zie het maar eens te organiseren dat je ons, he, staand krijgt, he, of dat je hier met zijn allen op een skippy bal zit. Dat zou veel beter voor ons zijn. En dat, wij weten het, wij zijn gemotiveerd zelfs, we zitten gewoon in een stoel. Dat is hoe het gaat he.”                                   |
| 121 | “Ik vind echt dat er op maatschappelijk niveau meer gedaan moet worden, meer omdat als je bekijkt zeg maar, als we met zijn allen dikker worden, als we met zijn allen een bepaalde leefstijl hebben aangewend, dan vraag ik me af of wij de enige zijn die dat moeten proberen het wiel uit te vinden en op proberen moeten te lossen. Ik denk dat er maatschappelijk ook veel meer informatie gegeven moet worden, dat er een ander klimaat ontstaat, of dat ik de hoop heb dat er een ander klimaat ontstaat daarin.” |
| 122 | “Geen ongezonde voedingen aanbieden vanuit scholen of zoiets.”                                                                                                                                                                                                                                                                                                                                                                                                                                                           |
| 123 | “En bovendien schep dan ook eerst de voorwaarden voor een gezonde maatschappij. Want nu he, de [fastfoodketen] is op iedere hoek van de straat. Fruit is nog altijd duurder dan fastfood en chips. Ja, ik bedoel, daar, mensen volgen wel de weg van de minste weerstand.”                                                                                                                                                                                                                                               |

|     |                                                                                                                                                                                                                                                                                                                                                                                                                                                                                                                                       |
|-----|---------------------------------------------------------------------------------------------------------------------------------------------------------------------------------------------------------------------------------------------------------------------------------------------------------------------------------------------------------------------------------------------------------------------------------------------------------------------------------------------------------------------------------------|
| 124 | “Het huidige zorg financiering systeem is natuurlijk ook snijden [opereren], dat loont enorm he.”                                                                                                                                                                                                                                                                                                                                                                                                                                     |
| 125 | “Gezond gedrag moeten we belonen. [...] Ja want die slag moet de zorgverzekeraar, vind ik, echt maken. Daar wordt veel te veel uitgegaan van ziekte. [...] Ons hele gezondheidssysteem is geënt op ziekte behandelen. Ja, voor mij, is het niet meer betaalbaar. Dus we moeten ook een slag maken. Op comorbiditeit, op leefstijl. Dat kunnen we niet meer betalen.”                                                                                                                                                                  |
| 126 | “Zou je dat ontschotten kunnen noemen wat je noemt, zeg maar [verbinden van de eerste en de tweede lijn], ik denk dat dat super belangrijk is, ontschotten.”                                                                                                                                                                                                                                                                                                                                                                          |
| 127 | “Nou dit soort programma’s als [naam televisieprogramma], vorige week was deel 1 cholesterol. Nu was deel 2 [naam televisieprogramma] extra cholesterol. Je wilt niet weten hoeveel mensen ik deze week op het spreekuur heb, die willen allemaal stoppen met hun statines. En dan zeg ik ‘ja, maar ik volg de richtlijn he’, ‘ja niets mee te maken ik vind het rot spul en ik heb spierpijn’. Ja, maar ja, straks krijg je een infarct en dan heb ik het gedaan. [...] Dat is dus een discussie, dus deze programma’s helpen niet.” |
| 128 | “Wat klikt, ja soms klikt het gewoon niet. Ik heb wel eens mensen, dat klikt niet, en met mijn directe collega klikt het wel. En dan, we doen hetzelfde in principe eigenlijk met patiënten.”                                                                                                                                                                                                                                                                                                                                         |
| 129 | “Alhoewel je daar toch bij de oudere populatie wel merkt, dat ze daar wel wat meer autoriteit nog hebben voor de dokter, dus dat scheelt wel een heel stuk.”                                                                                                                                                                                                                                                                                                                                                                          |
| 130 | “Ik heb het idee dat de patiënten vaak de fysio veel meer vertrouwen dan de dokter.”                                                                                                                                                                                                                                                                                                                                                                                                                                                  |
| 131 | “En wat ik lastig vind als huisarts is, je kan niet zo hard zijn als in de tweede lijn. In de tweede lijn op [afdeling] kon ik lekker hard zijn, want je ziet die patiënten toch niet meer terug. Maar als huisarts heb jij een band met je patiënt, je kunt niet zomaar zeggen van ‘ik doe dit niet’. Want je weet dat die patiënt daarna niet meer zo snel bij je komt, of dat tegen je houdt van ‘ja maar dokter u wilt me niet verwijzen’. Je wilt gewoon een goede relatie houden met je patiënten.”                             |
| 132 | “Ik heb er geen problemen mee. Als ik iemand krijg en die is te dik dan zeg ik het. Want daarvoor zitten ze ook bij mij.”                                                                                                                                                                                                                                                                                                                                                                                                             |
| 133 | “Je bespreekt het gewicht, maar ik ga niet zeggen van, ‘je moet afvallen en onder zoveel kom je er bij niet meer in’ of wat dan ook. Dat deed ik in het begin wel maar dat gaf heel veel wrijving en heel veel onrust, en dat kostte nog meer tijd.”                                                                                                                                                                                                                                                                                  |
| 134 | “Bijvoorbeeld onze diabeten, die bestempelen we als chronisch zieken, en die lopen bij onze praktijkondersteuner. Maar onze patiënten met artrose [...] is ook een chronische ziekte, maar die bestempelen we denk ik niet zo in onze praktijk, en die lopen ook niet bij de praktijkondersteuner, die hebben we veel minder in beeld. He, die worden veel minder begeleid.”                                                                                                                                                          |
| 135 | “Dat is ook wel een beetje het imago he, wat dat bij de patiënt heeft, van slijtage dat, een oude auto, ja vervangen, ja. Dat is wel wat je vaak hoort, dat is het enige wat je                                                                                                                                                                                                                                                                                                                                                       |

|     |                                                                                                                                                                                                                                                                                                                                                                                                |
|-----|------------------------------------------------------------------------------------------------------------------------------------------------------------------------------------------------------------------------------------------------------------------------------------------------------------------------------------------------------------------------------------------------|
|     | kunt doen. Vervangen. Dat je dan iets met je leefstijl kunt doen, dat is niet heel bekend tenminste.”                                                                                                                                                                                                                                                                                          |
| 136 | “Want we hebben het steeds over nieuwe heup, en als je tegen iemand zegt dat die heupslijtage, het is eerste wat ze dan denken is een nieuwe heup.”                                                                                                                                                                                                                                            |
| 137 | “Als je hetzelfde leven blijft leiden, is dat die nieuwe knie of nieuwe heup ook niet het eeuwige leven heeft. Dus er moet wel iets ook gaan veranderen, willen ze met die nieuwe knie of heup blijven, prettig leven.”                                                                                                                                                                        |
| 138 | “Ja voor mij de enige ingang met name naar gewicht is om te zeggen van ‘oké, als ik u opereer, dan ga, krijgt u een prothese, de overleving van de prothese hangt van uw gewicht af’. Dan heb ik een ingang om, om mensen eventueel ergens naartoe te sturen.”                                                                                                                                 |
| 139 | “Ook omdat ze [specifieke patiëntenpopulatie] heel veel werk op de knieën doen. Dan is het niet perse de leefstijl.”                                                                                                                                                                                                                                                                           |
| 140 | “Maar ik denk dat de relatie [tussen artrose en leefstijl], want dat bedoel jij, de relatie die bestaat wel, daar zijn we wel overtuigd van. Alleen de vraag is of je dat als de schuld moet zien van degenen die, he, die dat, voor een deel misschien ook wel overkomt. Omdat je de genen tegen hebt, omdat je je sociale netwerk niet hebt, omdat je de financiën, nou alle andere dingen.” |
| 141 | [wanneer je zou weigeren om een operatie uit te voeren] “Het is te rechtvaardigen als het risico van de operatie te hoog is. Want dan heb je gewoon slechte medische zorg. Maar het is niet te rechtvaardigen als je zegt van, ‘ja zolang jij niet je best doet dan doe ik het ook niet’.”                                                                                                     |
